# Supplementary material for: CDKN2A/p16INK4a expression is associated with vascular progeria in chronic kidney disease
Source: PubMed Central journal article supplement (PMC5361677; doi:10.18632/aging.101173), 2017-02-09
Supplement: aging-09-494-s001.pdf [file aging-09-494-s001.pdf]

## SUPPLEMENTARY MATERIAL

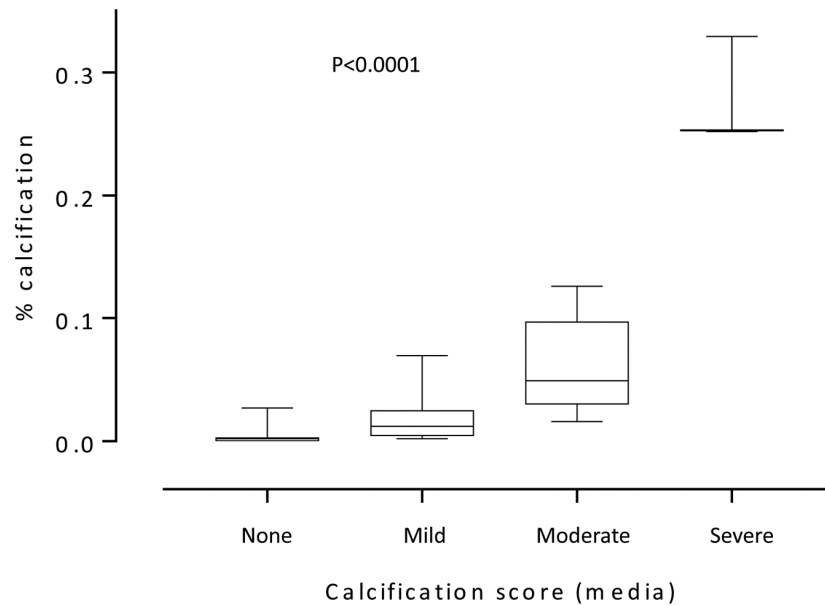

**Suppl. Figure 1.** The degree of calcification (%) as determined by semi-automated picture analysis in the four groups of calcification (determined by histological analysis by two pathologists).

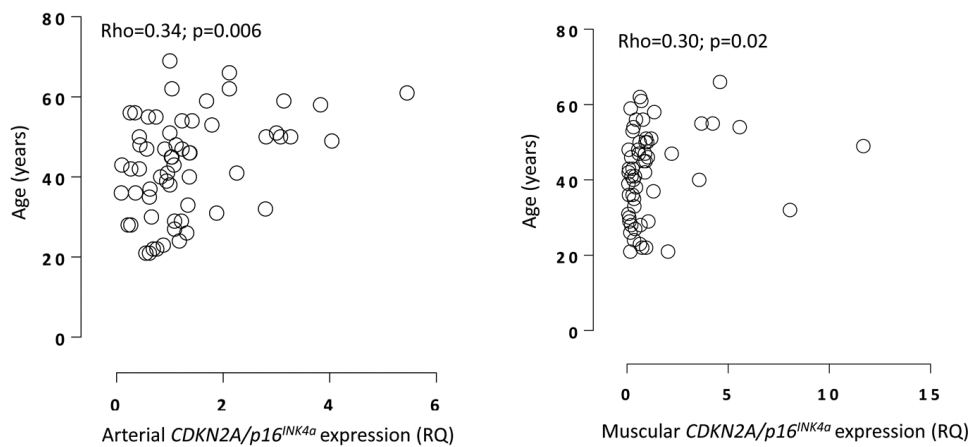

**Suppl. Figure 2.** Correlation between chronological age and the arterial (A) and muscular (B) expression of CDKN2A/p16INK4a.

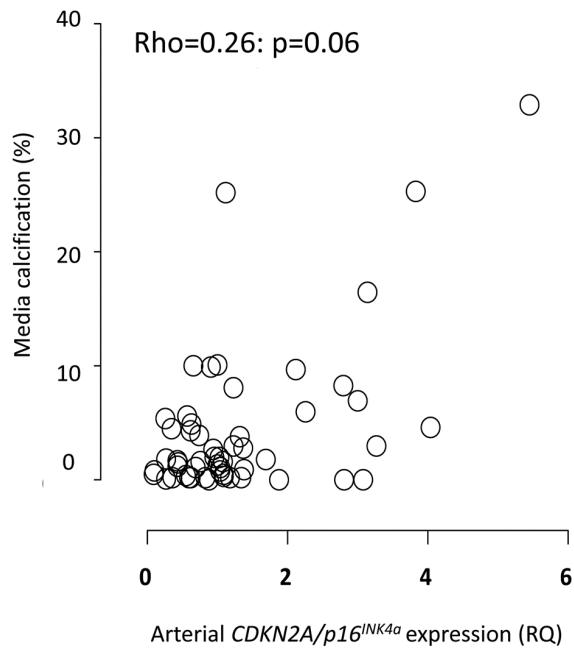

**Suppl. Figure 3.** Correlation between arterial expression levels of CDKN2A/p16INK4a and % calcified media (by semi-automated picture analysis). Following the correction for age the association achieved statistical significance ( $p=0.0003$ ).

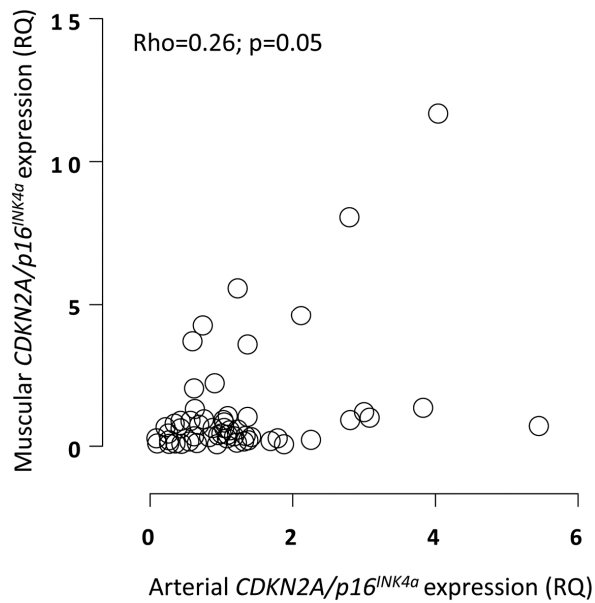

**Suppl. Figure 4.** Correlation between the arterial and muscular expression of CDKN2A/p16INK4a in end-stage renal disease.
